1 Full title: Pleiotropy in enhancer function is encoded through diverse genetic  
2 architectures.

3

4 Short title: Enhancer pleiotropy and *cis*-regulatory architecture

5

6 Ella Preger-Ben Noon<sup>1¶</sup>, Gonzalo Sabarís<sup>2¶</sup>, Daniela Ortiz<sup>2</sup>, Jonathan Sager<sup>1</sup>, Anna Liebowitz<sup>3</sup>,  
7 David L. Stern<sup>1\*</sup> and Nicolas Frankel<sup>2\*</sup>

8

9 <sup>1</sup> HHMI, Janelia Research Campus, Ashburn, Virginia, USA

10 <sup>2</sup> Departamento de Ecología, Genética y Evolución, IEGEBA-CONICET, Facultad de Ciencias  
11 Exactas y Naturales, Universidad de Buenos Aires, Buenos Aires, Argentina

12 <sup>3</sup> Department of Molecular Biology, Princeton University, USA.

13

14 ¶These authors contributed equally to this work (E.P.B.N. and G.S. are listed in alphabetical  
15 order)

16 \*corresponding authors: David L. Stern <sternd@janelia.hhmi.org> and Nicolas Frankel  
17 nfrankel@ege.fcen.uba.ar

18

19

20

21

22

23 **Abstract**

24

25       Developmental genes can have complex *cis*-regulatory regions, with multiple  
26 enhancers scattered across stretches of DNA spanning tens or hundreds of kilobases. Early  
27 work revealed remarkable modularity of enhancers, where distinct regions of DNA, bound by  
28 combinations of transcription factors, drive gene expression in defined spatio-temporal  
29 domains. Nevertheless, a few reports have shown that enhancer function may be required in  
30 multiple developmental stages, implying that regulatory elements can be pleiotropic. In  
31 these cases, it is not clear whether the pleiotropic enhancers employ the same transcription  
32 factor binding sites to drive expression at multiple developmental stages or whether  
33 enhancers function as chromatin scaffolds, where independent sets of transcription factor  
34 binding sites act at different stages. In this work we have studied the activity of the enhancers  
35 of the *shavenbaby* gene throughout *D. melanogaster* development. We found that all seven  
36 *shavenbaby* enhancers drive gene expression in multiple tissues and developmental stages at  
37 varying levels of redundancy. We have explored how this pleiotropy is encoded in two of  
38 these enhancers. In one enhancer, the same transcription factor binding sites contribute to  
39 embryonic and pupal expression, whereas for a second enhancer, these roles are largely  
40 encoded by distinct transcription factor binding sites. Our data suggest that enhancer  
41 pleiotropy might be a common feature of *cis*-regulatory regions of developmental genes and  
42 that this pleiotropy can be encoded through multiple genetic architectures.

43

44

## 45 **Introduction**

46

47       Developmental genes can have complex *cis*-regulatory regions, with multiple  
48 enhancers scattered across stretches of DNA spanning tens or hundreds of kilobases [1-4].  
49 Over many years, numerous studies have revealed a remarkable modularity of enhancer  
50 function, where distinct regions of DNA, bound by combinations of transcription factors, drive  
51 gene expression in defined spatio-temporal domains [5]. It has long been hypothesized that  
52 enhancer modularity facilitates evolution, because mutations in one enhancer can alter gene  
53 function without affecting the activity of other enhancers, thereby minimizing pleiotropic  
54 effects [6-8]. It is not clear, however, if the apparent modularity of enhancers reflects  
55 ascertainment bias, since few studies have looked explicitly for enhancer pleiotropy.

56       Many of the genes that regulate development have a pleiotropic role and their  
57 function is required in multiple developmental stages. A paradigmatic case of pleiotropy is  
58 that of *Hox* genes, a family of master transcription factors that specify the identity of body  
59 parts [9]. Recently, it has been uncovered that the same mechanism activates *Hox* genes in  
60 different organs of the mouse: the same enhancers activate *Hox* genes in both digits and  
61 genitalia [10]. Clearly, this implies that enhancers can have pleiotropic functions. It is not  
62 evident, however, whether these enhancers employ the same transcription factor binding  
63 sites to drive expression at multiple developmental stages or whether enhancers function as  
64 chromatin scaffolds, where independent sets of binding sites act at different stages.

65       *shavenbaby* (*svb*) encodes a transcription factor that orchestrates the differentiation of  
66 non-sensory cuticular projections (hereafter called trichomes) in *Drosophila melanogaster*

67 [11,12]. *Svb* expression has been studied in detail mainly in the late embryonic stages, where  
68 it directs development of the epidermis and, concomitantly, the first-instar larval cuticle ([13],  
69 Fig 1B). *Svb* is also expressed in the pupal epidermis where it is required for trichome  
70 development in part of the wing, notum and abdomen [14,15] and for proper development of  
71 leg joints [16].

72 The *cis*-regulatory region of the *svb* gene has been experimentally dissected in *D.*  
73 *melanogaster* [17-21]. We have shown that the embryonic expression of *svb* is generated by  
74 seven enhancers that are located in a ~80 kb region upstream of the transcription start site of  
75 the gene ([11], Fig 1A). These seven enhancers drive partially overlapping expression patterns  
76 in the late embryo, and these overlapping patterns are required for robust gene expression  
77 [20]. Evolutionary changes in five of these enhancers led to reduced *svb* expression in the  
78 dorsum of the *D. sechellia* embryo, resulting in differentiation of naked cuticle, rather than  
79 trichomes, in *D. sechellia* [11,20,21].

80 In this work we show that all seven *svb* enhancers drive gene expression in multiple  
81 tissues and developmental stages at varying levels of redundancy. We have explored how this  
82 pleiotropy is encoded in two of these enhancers. In one enhancer, the same transcription  
83 factor binding sites contribute to embryonic and pupal expression, whereas for a second  
84 enhancer these roles are largely encoded by distinct sites. Our data suggest that enhancer  
85 pleiotropy might be a common feature of *cis*-regulatory regions of developmental genes, and  
86 that this pleiotropy can be encoded through multiple genetic architectures.

87

88

89 **Results**

90

91 *Shavenbaby* is expressed in the larval and pupal epidermis

92

93 To characterize the expression of *svb* in larval and pupal tissues, we engineered a BAC  
94 carrying the complete *cis*-regulatory region of *svb* by placing the coding sequence of a  
95 nuclear GFP upstream of *svb* ATG (Fig 1A). We stably integrated this BAC, named *svbBAC*-GFP,  
96 in the fly genome through attP/attB recombination. We confirmed that *svbBAC*-GFP  
97 recapitulates expression of the native gene in embryos (Fig 1B). This epidermal expression  
98 prefigures the location of trichomes in the first-instar larva cuticle (Fig 1C). We then examined  
99 *svb* expression in later stages. We observed GFP expression in the epidermis of third-instar  
100 larvae (data not shown). This may reflect persistence of the GFP reporter from second-instar  
101 larvae, when *svb* expression is probably required to cause differentiation of trichomes that  
102 will decorate the cuticle of third-instar larvae. We also detected GFP expression in larval non-  
103 epidermal structures of ectodermal origin that do not produce trichomes. Specifically, we  
104 observed GFP in the central nervous system (Fig 1D), the foregut (Figs 1E-F), the imaginal  
105 discs (Fig 1G), and the trachea (data not shown). We also found that *svbBAC*-GFP pupae  
106 display GFP expression in all epidermal tissue (Fig 1H), which is consistent with the fact that  
107 the adult exoskeleton is almost completely covered with trichomes (Fig 1I).

108

109 *Shavenbaby* is required for the formation of many, but not all, adult trichomes

110

111           Next we asked whether *svb* function is required for trichome development in the  
112 pupal epidermis, as it is in the embryo. Flies carrying *svb* null mutations normally die before  
113 they eclose, but we identified a few male escapers (carrying a null *svb* allele on their single X  
114 chromosome) that allowed us to assess the requirement of *svb* for trichome development in  
115 the adult cuticle. Escapers had fewer trichomes in the wing, the legs, and the dorsal abdomen  
116 than control flies, but they still retained trichomes over much of the exoskeleton (Fig 2).  
117 However, in most regions, trichomes were smaller than normal or were misshapen.

118           We observed that no trichomes developed in male *svb* escapers on the dorsal  
119 abdominal segment 5 (compare Figs 2H and 2J). This observation stimulated a detailed  
120 inspection of the wild type trichome pattern and we found a sexual dimorphism in the shape  
121 and size of trichomes in the dorsal abdomen: females produce trichomes of similar density  
122 and stoutness on abdominal segments A1 through A5 (S1A Fig), whereas males produce  
123 qualitatively different trichomes on abdominal segments A1-A4 vs A5 (S1A Fig). We observed  
124 that *svb* expression is lower in abdominal segment 5 versus more anterior segments in both  
125 sexes and this difference may contribute to the sexual dimorphism in trichome patterning  
126 (S1B Fig).

127           We confirmed the results observed with the male escapers by generating *svb*<sup>-/-</sup> clones  
128 in the adult. We observed loss of trichomes in *svb*<sup>-/-</sup> clones in the same regions where  
129 trichomes were lost in male escapers (see S2A Fig for an example), confirming that *svb*  
130 function is required for the production of some adult trichomes. We also observed loss of  
131 trichomes, change in trichome morphology and altered trichome distribution in the head  
132 cuticle (S2B Fig). Loss of *svb* function also modified the anatomy of the antennal arista (S2

133 Fig). In summary, although *svb* is expressed throughout the pupal epidermis (Fig 1H), it is  
134 required for the normal development of many, but not all, adult trichomes.

135

136 *The embryonic enhancers of svb drive expression in larva and pupa*

137

138 Since the BAC containing the complete *svb* regulatory region drives expression in  
139 embryonic, larval and pupal stages, we wondered whether the previously characterized  
140 embryonic enhancers also drove expression in later stages. In the third-instar larvae, we found  
141 that of the seven embryonic *svb* enhancers, five drove expression in the epidermis, six drove  
142 expression in the foregut and four drove expression in the central nervous system of L3 (Fig  
143 3A and S3 Fig). These results are consistent with the expression of the *svb*BAC-GFP (Fig 1). In  
144 the pupa at 90 h after puparium formation (APF), all embryonic *svb* enhancers drove  
145 widespread epidermal expression (Fig 3A-B and S3 Fig.). Most notably, all seven enhancers  
146 drive expression throughout the dorsal abdomen (Fig 3B). This level of overlapping  
147 expression far exceeds patterns of overlapping embryonic expression that we reported  
148 previously [20]. Hence, the seven embryonic *svb* enhancers are both pervasively pleiotropic  
149 and redundant.

150

151 *Pupal expression of shavenbaby is conserved in D.sechellia*

152

153 We have previously shown that five of the *svb* enhancers evolved reduced embryonic  
154 activity in *D. sechellia*, a species closely related to *D. melanogaster* [11,20,21]. This loss of

155 enhancer function reduces *svb* expression in *D. sechellia* embryos, causing the loss of many  
156 first-instar trichomes [11,17]. In contrast, *D. sechellia* adults, like *D. melanogaster* adults, are  
157 completely covered with trichomes (data not shown). To test whether pupal *svb* expression  
158 was conserved in *D. sechellia*, we generated a *D. sechellia svbBAC-GFP* with the same genomic  
159 boundaries as the *D. melanogaster svbBAC-GFP* (S4A Fig). The *D. sechellia svbBAC-GFP*  
160 recapitulated the embryonic expression pattern of *D. sechellia svb*, and no expression was  
161 detected in quaternary cells of the dorsal and lateral epidermis (S4B Fig). In contrast, the *D.*  
162 *sechellia svbBAC-GFP* drove GFP expression throughout the dorsal and ventral pupal  
163 epidermis, just like the *D. melanogaster svbBAC-GFP* (S4C Fig). Therefore, it is likely that at  
164 least some of the *D. sechellia svb* enhancers that lost embryonic expression still drive  
165 expression in pupa. To explore this problem further, we examined the embryonic and pupal  
166 functions of two evolved *svb* enhancers in more detail.

167

168 *The same transcription factor binding sites within E6 are used in both embryo and pupa*

169

170 We showed previously that the *D. melanogaster E6* enhancer (*meE6*) encodes multiple  
171 transcription factor binding sites for the transcriptional activators *Arrowhead (Awh)* and  
172 *Pannier (Pnr)* (Fig 4A-B, [17]). *D. sechellia E6 (secE6)* lost four *Awh* sites and acquired a  
173 transcription factor binding site for the strong repressor *abrupt*, causing complete loss of its  
174 embryonic function (Fig 4C, [17]). We exploited this evolutionary transition to explore  
175 pleiotropic roles of *E6*.



176 To compare the activities of *meIE6* and *secE6* in pupa, we generated new transgenes  
177 with fluorescent reporters that were integrated in the same genomic location. We reasoned  
178 that if transcription factor binding sites required for embryonic function are required also for  
179 pupal expression, then *secE6* should not drive pupal expression. Consistent with our previous  
180 observations (Fig 3), the new *meIE6* transgene drove strong expression in the wing and dorsal  
181 abdomen of the developing pupa (Fig 4D and 4F). In contrast, *secE6* did not drive expression  
182 in most of the pupal domains (Fig 4E and 4G). Thus, the evolutionary changes in transcription  
183 factor binding sites of *secE6* that led to reduced embryonic expression also reduced pupal  
184 expression.

185 Next, we tested the contributions of individual classes of transcription factor binding  
186 sites. We examined a mutated version of the minimal enhancer, *E6B* (Fig 4A), which lacks six  
187 *Awh* sites. Like the full length *E6*, *E6B* drove both embryonic and pupal expression (Figs 4H-J,  
188 [17]. Disruption of the *Awh* sites from *E6B* eliminated most pupal abdominal expression (Fig  
189 4K). Additional mutations in the *Pnr* sites led to an even stronger reduction in pupal  
190 expression (Fig 4L). All together, these experiments demonstrate that transcription factor  
191 binding sites within *E6* are 'reused' at multiple developmental stages.

192

193 *Different regulatory information generates the various expression patterns of enhancer Z*

194

195 Next, we analyzed the *Z* (*melZ*) enhancer, another *svb* enhancer whose embryonic  
196 activity was lost in *D. sechellia* [20]. We dissected the ~4.4 Kb of *melZ* and identified a ~1.3 Kb  
197 minimal enhancer we named *melZ1.3* (S5 Fig). As expected, the orthologous sequence from

198 *D. sechellia* (*secZ1.3*) did not drive embryonic expression (Fig 5B, [20]). *melZ1.3* recapitulated  
199 the full *Z* expression pattern in pupae (Fig 3), including expression in the wings (Fig 5C), legs  
200 (Fig 5E), notum and abdomen (Fig 5G). In contrast to our observations for the *E6* enhancer, we  
201 found that the *secZ1.3* enhancer drove expression in all tissues where *melZ1.3* is active (Figs  
202 5D, 5F and 5H). Therefore, the evolutionary changes that led to the loss of *Z* expression in *D.*  
203 *sechellia* embryos did not alter *Z* function in pupae.

204 To test whether the *Z* enhancer is divided into discrete modules that drive expression  
205 at different developmental stages, we dissected *melZ1.3* into smaller fragments (Fig 5I) and  
206 tested their ability to drive expression in embryos and pupae. We found that embryonic  
207 expression is encoded mostly in *melZ1.3L* (Figs 5J-K), while pupal expression is encoded  
208 mainly by *melZ1.3R* (Figs 5L-O and S5 Fig). In agreement with the results for *secZ1.3*, we found  
209 that *secZ1.3R* drove expression in pupal epidermis (data not shown). Thus, the embryonic and  
210 pupal expression patterns are encoded by adjacent sequences in the *Z* enhancer region.

211 The embryonic and pupal enhancer domains are not strictly separated, however. We  
212 identified a 300 bp fragment named *melZ0.3* that drives strong embryonic expression (Fig 5P  
213 and S5 Fig). Interestingly, *melZ0.3* drove stronger expression than the longer *melZ1.3* (Fig 5Q),  
214 suggesting that regions outside *melZ0.3* contain binding sites for transcriptional repressors,  
215 including sites within the pupal enhancer region *melZ1.3R* (Fig 5R). Nonetheless, the  
216 transcription factor binding sites that activate gene expression appear to be present in non-  
217 overlapping adjacent domains. Thus, the *Z* enhancer generates its many functions with  
218 different binding sites, which are located in mostly non-overlapping regions.

219

220 *Deletion of individual enhancers has contrasting outcomes in embryo and pupa*

221

222 In recent years it has become evident that the expression of many developmental  
223 genes is controlled by multiple enhancers with redundant functions [22]. We have previously  
224 demonstrated that the *svb* enhancers drive partially redundant expression patterns in the  
225 embryo (Fig 3A), providing phenotypic robustness for larval trichome patterns in the face of  
226 environmental and genetic variation [20]. Remarkably, pupae display even greater  
227 redundancy of *svb* enhancer expression than embryos (Fig. 3B). We therefore decided to  
228 explore the functional consequences of this redundancy.

229 We used BAC recombineering to generate deletions of individual enhancers (*Z1.3*, *E6*  
230 and *7H*) in the *svb*BAC-GFP, and integrated these BACS in a specific *attP* site of the *D.*  
231 *melanogaster* genome (Fig 6A). As an internal control we used a wild-type *svb*BAC with a  
232 DsRed reporter (*svb*BAC-DsRed) that was integrated into a different *attP* site (to avoid  
233 transvection effects between BACs). We then quantified expression patterns of the BACs  
234 carrying deletions (expressing GFP) relative to the control BAC (expressing DsRed) in the same  
235 animal (Fig 6, see Materials and Methods for details).

236 Removing *Z1.3*, *E6*, or *7H* resulted in a decrease of the mean GFP expression in  
237 embryos of 28%, 46%, and 38% respectively (Fig 6B). However, none of the BACs with  
238 enhancer deletions drove reduced reporter expression in the pupal epidermis of abdominal  
239 segment A4 (Fig 6C). On the contrary, we determined that the deletion of single enhancers  
240 slightly increases reporter expression. This fact suggests that the function of *svb* enhancers  
241 changes during development.

242

243 *Deletion of multiple enhancers in the svb locus does not affect the adult trichome pattern*

244

245 To examine the importance of this redundancy on the phenotypic output of *svb*  
246 function we examined the effects of several deficiencies that remove part of the *svb*  
247 regulatory region in the native locus. We used *Df(X)svb<sup>108</sup>*, a deletion of the three most distal  
248 enhancers (*DG2*, *DG3* and *Z*, [20]) and a larger deletion, *Df(X)svb<sup>106</sup>*, that removes the four most  
249 distal enhancers (*DG2*, *DG3*, *Z* and *A*, Fig 7A). We showed previously that the *Df(X)svb<sup>108</sup>* line  
250 produces a normal number of first-instar larval trichomes when embryos develop at their  
251 optimal temperature of 25°C [20]. However, when embryos are grown at a stressful  
252 temperature, 32°C, they develop with significantly fewer larval trichomes [20]. We found that  
253 *Df(X)svb<sup>106</sup>* produces similar results (data not shown).

254 We could not find any gross changes in the trichome pattern of females (data not  
255 shown) when pupae are grown at 25°C. We did notice, however, a small but consistent  
256 trichome defect in males carrying either deficiency grown at 25°C: the dorsum of abdominal  
257 segment A5 had fewer trichomes than wild type males (Fig 7B). This result is consistent with  
258 the phenotype of male *svb* escapers (Fig 2) and the observation that *svb* is expressed in this  
259 abdominal segments at lower levels (S1B Fig). Growing *Df(X)svb<sup>108</sup>* or *Df(X)svb<sup>106</sup>* pupae at 32°C  
260 did not alter the adult trichome pattern (data not shown). Hence, the adult trichome pattern  
261 is largely robust to removal of up to four of the seven *svb* enhancers. In contrast to the effect  
262 of these deficiencies on first-instar larvae, stressful growth temperatures in pupa do not  
263 significantly alter adult trichome development. Finally, adult *D. sechellia* males displayed an

264 A5 trichome pattern identical to that of *D. melanogaster* (Fig 7B) despite the fact that *secE6*  
265 drives reduced expression in the pupal epidermis.

266

## 267 **Discussion**

268 The *svb* gene encodes a master transcription factor that determines the fate of  
269 epidermal cells in *Drosophila melanogaster* [14]. It has been known for some time that the  
270 embryonic activity of SVB is necessary to pattern the first-instar larva cuticle [13]. In this work  
271 we show that *svb* is expressed in several structures of third-instar larvae which have an  
272 ectodermal origin (foregut, central nervous system, imaginal discs and epidermis).  
273 Furthermore, guided by previous research [14,15], we demonstrate that *svb* is expressed all  
274 over the pupal epidermis, and that this expression is required for the development of most of  
275 the adult trichomes.

276 In this work we demonstrate that the seven enhancers of *svb* that drive expression in  
277 the embryo also generate expression in third-instar larva and pupa. Thus, the seven  
278 enhancers of *svb* have a pleiotropic role during development. Recently, studies of chromatin  
279 conformation showed that the same genomic regions are active in the regulation of gene  
280 expression in both developing limb and developing genitalia of mouse [10]. These data  
281 strongly suggested that enhancers might be used in entirely different developmental  
282 contexts [10]. Later studies reported that the HLEB enhancer of the *Tbx4* gene functions  
283 during both limb and genitalia formation in mice, corroborating the idea that the same  
284 regulatory element can be active in two dissimilar contexts [23]. Altogether, our data and  
285 previous reports [10,23,24] suggest that pleiotropy of enhancer function might be a common

286 feature of *cis*-regulatory regions. A possible explanation for the pleiotropic role of enhancers  
287 is that these regions of the genome are structurally or topologically special, and that their  
288 qualities facilitate the interaction with basal promoters. This idea is supported by the fact that  
289 there is conservation in the position of enhancers in distant lineages [25,26]. Alternatively, it  
290 can be hypothesized that new expression patterns are easier to evolve within pre-existent  
291 regulatory landscapes and, thus, there is nothing special about the position of enhancers in  
292 the genome.

293         There are two fundamentally distinct models by which pleiotropic enhancers could  
294 encode expression in different spatio-temporal domains. First, the same transcription factor  
295 binding sites could be used to drive expression in different domains or, second, distinct  
296 transcription factor binding sites within the same enhancer region could drive different  
297 patterns. We studied two pleiotropic *svb* enhancers in detail and found one example that  
298 supports each model. For example, we find that Awh and Pnr binding sites, which activate *E6*  
299 in the embryo, are also needed to activate *E6* in the pupa. Similarly, it has been shown that  
300 Abd-B and STAT binding sites are required for the function of a *Poxn* enhancer in two  
301 developmental contexts [27]. In contrast, in the *svb Z1.3* enhancer, we find that transcription  
302 factor binding sites that function in the embryo in pupa are mostly independent. This type of  
303 architecture might explain how the *Tbx4* enhancer lost its hind-limb function in snakes  
304 without losing its activity in genitalia [23]. In summary, we found that there are multiple  
305 genetic architectures through which single enhancers can drive pleiotropic expression  
306 patterns.

307 Our results suggest that the classical view of enhancers as strongly modular genomic  
308 elements should be reevaluated: transcription factor binding sites can be 'reused' during  
309 development and enhancer pleiotropy seems to be a common phenomenon. These facts  
310 allow us to challenge the notion that conceives enhancers as elements that are active in a  
311 single developmental context and evolutionarily unconstrained. Often, enhancer function is  
312 schematized with a univocal relationship between a DNA fragment and an expression pattern  
313 (one enhancer gives only one expression pattern; for example see [28-30]). This  
314 schematization, though generally made to illustrate a concept, conveys the wrong idea of  
315 enhancers as always being active in a single context. On the other hand, the 'reuse' of  
316 transcription factor binding sites may impose a limit for enhancers to evolve new functions.  
317 Thus, pleiotropic enhancers may sometimes constrain and sometimes facilitate evolution,  
318 depending on precisely how pleiotropy is encoded.

319 We observed extensive redundancy of *svb* enhancer activity in pupal stages. This  
320 redundancy far exceeds the redundancy we had characterized previously for the embryonic  
321 expression pattern, which is required for phenotypic robustness [17,20]. In fact, we observed  
322 that deleting individual enhancers has contrasting outcomes in embryo and pupa. Whereas in  
323 embryos the loss of one enhancer diminishes gene expression, in pupa the lack of a single  
324 enhancer generates a slight increase in gene expression. Furthermore, flies carrying only  
325 three of the total seven *svb* enhancers still produce largely normal adult trichome patterns,  
326 even when pupae are grown under stressful conditions. In summary, the function of *svb cis-*  
327 *regulatory region in pupa appears to result in strong robustness of the adult trichome*  
328 *pattern.*

329 We have shown that *svb* enhancers are pleiotropic and that their expression is highly  
330 redundant. Indeed, in *D. sechellia* these enhancers drive enough pupal *svb* expression  
331 through stage-specific transcription factor binding sites that the embryonic expression  
332 pattern was free to evolve without altering the adult expression pattern. However, it is also  
333 possible to imagine a scenario with less redundancy and where pleiotropy is encoded in  
334 enhancers through the same transcription factor binding sites (as in the case of enhancer *E6*),  
335 which would strongly constrain the evolution of expression patterns. At present, it is unclear  
336 how many enhancers in the genome are pleiotropic, and how their pleiotropy tends to be  
337 encoded. Further studies should help determine the extent and encoding of enhancer  
338 pleiotropy, clarifying the potential role of enhancer pleiotropy in evolution.

339

## 340 **Materials and Methods**

### 341 *Genetic constructs and transgenesis*

342

343 P[acman] CH321-64E24 (<https://bacpacresources.org>) contains a 91,307 bp. insert that  
344 includes the *cis*-regulatory region, the first exon and part of the first intron of *shavenbaby*  
345 (<https://www.ncbi.nlm.nih.gov/clone/33521512>). We used BAC recombineering [31] to insert  
346 a GFP-NLS or a DsRed-NLS in the initiation codon of *svb* to generate *svb*BAC-GFP and *svb*BAC-  
347 DsRed and to delete specific enhancers in the context of *svb*BAC-GFP. All primers and  
348 constructs that were used for BAC recombineering are summarized in S1 Table.

349 The *D. sechellia svb* gene, including the *cis*-regulatory region, the first exon and part of  
350 the first intron (droSec1: super\_4:1,797,878-1,880,229) was subcloned from the BAC DSE1-



351 007L13 (RIKEN BioResource Center DNA Bank) into P[acman]. Subsequently, BAC  
352 recombineering was used to insert a GFP-NLS in the initiation codon of *svb* to generate *sec-*  
353 *svb*-BAC-GFP.

354 The GFP-NLS in pS3AG (a gift from Thomas Williams, addgene plasmid # 31171) was  
355 replaced with a DsRed-NLS to generate pS3AR. The DsRed-NLS was released from pRed H-  
356 Stinger with enzymes XhoI and SpeI. GFP-NLS was removed from pS3AG by cutting with  
357 enzymes XhoI and SpeI. The pS3AG backbone (without GFP-NLS) was then ligated to the  
358 DsRed-NLS. All other transgenes generated in this study were constructed by Genscript  
359 (summarized in S2 Table). These constructs were integrated into the fly genome through  
360 attP/attB recombination (Rainbow Transgenic flies).

361

## 362 *Fly strains*

363

364 Enhancer-reporter lines are summarized in S2 Table. In order to generate *Df(X)svb<sup>106</sup>*,  
365 pBacPtp4E[f02952] and pBac[f06356] were recombined onto the same X chromosome and a  
366 homozygous stock was generated. This stock was crossed to a line containing a *hs::flipase* and  
367 larvae were heat shocked at 37°C for 1 h each day during larval development. After crossing  
368 these adults to *white* flies, we selected adults that had lost one copy of the *white+* transgene  
369 (originating on one of the pBac transgenes), which is expected if the two FRT sites  
370 recombined to generate a deletion. The deletion was confirmed by PCR, with primers located  
371 right outside the deletion (5'- CGTACCGCCTGTTTGCCATA-3' and 5'-  
372 TCCAGACGGATTTTATGGCC-3'), which amplified the expected 7.3 kb fragment containing a

373 pBac transposon. We then generated a stock homozygous for the deletion. *Df(X)svb<sup>108</sup>* was  
374 previously described [20]. *D.sechellia* 14021-0248.28 was obtained from the Drosophila  
375 Species Stock Center at the University of California.

376

377 We generated large clonal territories of *svb<sup>-</sup>* tissue by employing the Minute technique  
378 (Morata & Ripoll, 1975). With this technique clones that contain two wild-type alleles of  
379 *Minute<sup>+</sup>* over-proliferate relative to neighboring cells that are heterozygous for a *Minute* null  
380 mutation. To mark *svb<sup>-</sup>* tissue, we recombined three visible markers (*y<sup>1</sup>*, *w<sup>1</sup>*, and *f<sup>36a</sup>*) onto a  
381 chromosome together with a null mutation for *svb* (*svb<sup>1</sup>*), to generate *y<sup>1</sup> w<sup>1</sup> svb<sup>1</sup> f<sup>36a</sup>*. We then  
382 crossed this strain to flies carrying a dominant Minute allele on the X chromosome. We  
383 exposed larvae carrying the genotype *y<sup>1</sup> w<sup>1</sup> svb<sup>1</sup> f<sup>36a</sup> / M* to X-Rays (1000 Rad) between 24-72  
384 hours after egg laying. We screened females for clones homozygous for *svb<sup>1</sup>* by searching for  
385 cuticle containing bristles that were both yellow and forked. We compared trichome patterns  
386 in these clones with trichome patterns on flies homozygous for the *f<sup>36a</sup>* allele.

387

### 388 *X-gal staining*

389

390 Third instar larvae were dissected in PBS and fixed in PBS with 4% formaldehyde for 10  
391 min. Staged pupae were removed from the pupal case and then fixed in PBS with 4%  
392 formaldehyde for 15 min. After washing in PBT (1X PBS + 0.1% Triton X-100), samples were  
393 incubated with X-Gal solution (5 mM  $K_4[Fe^{+2}(CN)_6]$ , 5 mM  $K_3[Fe^{+2}(CN)_6]$ , 1 mg/ml X-Gal in PBT)  
394 at 37°C for 1 hour. The samples were mounted and imaged with bright-field microscopy.

395 *Immunofluorescence*

396 Stage 15 embryos were collected, fixed, and stained using standard protocols with  
397 chicken anti-GFP (1:300, Aves Labs), rabbit anti-RFP (1:150, MBL), mouse anti- $\beta$ Gal (1:500,  
398 Promega), anti-chicken AlexaFluor 488 (1:250, ThermoFisher), anti-rabbit AlexaFluor 647  
399 (1:150, ThermoFisher) and anti-mouse AlexaFluor 546 (1:400, ThermoFisher). Pupal tissues  
400 were dissected, fixed and stained with mouse anti- $\beta$ Gal and anti-mouse AlexaFluor 546 as  
401 described [32].

402

403 *Microscopy and image analysis*

404

405 Embryos were prepared using standard protocols and immunostained with the  
406 antibodies described above. Pupae of the desired stages were removed from the pupal case  
407 and placed in a microscope slide for imaging. To analyze the effect of enhancer deletions in  
408 *svb*BACs we measured GFP and DsRed levels in embryos and pupae carrying *svb*BAC-GFP (WT  
409 and deletions) and *svb*BAC-DsRed (WT). GFP and DsRed signals were measured sequentially  
410 over a z-stack in a confocal microscope. Images were analyzed using ImageJ software  
411 (<http://rsb.info.nih.gov/ij/>). Firstly, background was subtracted using a 50-pixel rolling-ball  
412 radius in each slice of the confocal z-stack. Then, we calculated the Sum projection of the z-  
413 stacks for each channel in order to compare GFP versus DsRed levels. Max projections were  
414 obtained in order to analyze GFP levels between abdominal segments A4 and A5. For  
415 embryos, we applied the segmentation masks using the Sum projection of the DsRed channel  
416 with the ImageJ autothreshold tool ("IJ\_IsoData dark"). For pupal abdomens, segmentation

417 masks were applied with Ilastik 1.2.0 software (<http://ilastik.org>) to Sum projections of the GFP  
418 channel (GFP versus DsRed levels in A4) and Max projections (GFP levels in A4 and A5). We  
419 measured the fluorescence mean intensities of each nucleus with the 'Analyze particles' tool  
420 in ImageJ. Then, we calculated the average of the fluorescence mean intensity of all  
421 segmented nuclei. Last, we calculated the ratio GFP/DsRed in each nucleus and calculated the  
422 average ratio for all segmented nuclei.

423

#### 424 *Cuticle preparation*

425

426 Adults were collected and frozen until used. Adult cuticles were dissected in PBS and  
427 mounted in a microscope slide with a drop of 1:1 Hoyer's:lactic acid mixture. After overnight  
428 drying, the cuticles of adults were imaged with bright-field microscopy. The images were  
429 processed using Adobe Photoshop.

430

#### 431 **Acknowledgements**

432 We thank François Payre for providing the  $f^{36a}$  / FM6 stock. We thank Xiaorong Zhang  
433 of the Janelia Molecular Biology Shared Resource for help with the *sec-svb*-BAC-GFP  
434 recombineering and the Janelia Fly core facility for help with fly work. We thank the  
435 Bioimaging Core Facility at the Technion Rappaport Faculty of Medicine for help with  
436 imaging. E.P.B.N is grateful for the generous hospitality of Adi Salzberg and her lab members.  
437 E.P.B.N was supported by post-doctoral fellowships from the Human Frontier Science

438 Program. This work was supported in part by Fundación Bunge y Born and Agencia Nacional  
439 de Promoción Científica y Tecnológica (PICT 2013-2138) grants to N.F.

440

## 441 **Figure captions**

442

### 443 **Fig 1. *svb* expression throughout *Drosophila melanogaster* development.**

444 (A) Schematic representation of *svb*BAC-GFP. Gray boxes represent the seven embryonic  
445 enhancers. The site of insertion of the GFP-NLS is indicated in the scheme. (B) GFP expression  
446 recapitulates the expression pattern of *svb* in the embryo. (C) Trichome pattern of the first-  
447 instar larva. (D-G) GFP expression in non-epidermal structures of the third-instar larva: central  
448 nervous system (D), pharynx and salivary glands (E), esophagus and proventriculus (F), and  
449 wing imaginal disc (G) DAPI stain in magenta. (H) GFP expression in pupal epidermis. (I)  
450 Representation of the trichome pattern in the dorsum of an adult fly.

451

### 452 **Fig 2. *svb* is required for the production of trichomes in the adult cuticle.**

453 (A-J) The cuticle of control *f[36a]* adult wing (A-B), leg (E) and abdomen (G-H) is covered with  
454 trichomes. In *svb* null male escapers (*f[36a]*, *svb*<sup>1/Y</sup>, C-D, F and I-J) many trichomes, but not all,  
455 are replaced by naked cuticle. A complete loss of trichomes is observed in legs (F) and  
456 abdominal segment A5 (J). Blue boxes within the cartoon demarcate the imaged area.

457

### 458 **Fig 3. Pleiotropy and redundancy in the activity of the seven *svb* embryonic enhancers.**

459 (A) Schematization of the expression pattern driven by each enhancer (blue) in embryo (top),  
460 third-instar larva (middle) and pupa (bottom) (see S2 Fig for details). E: Epidermis, F: Foregut,  
461 ph: pharynx, e: esophagus, pv: proventriculus, C.N.S: Central Nervous System. (B) Expression  
462 pattern generated by each enhancer in the dorsal epidermis of the head, thorax and  
463 abdomen (90 hours APF).

464

465 **Fig 4. Reuse of TFBSs in the pleiotropic enhancer *E6*.**

466 (A) Scheme of *D. melanogaster E6* and *E6B* enhancers. Cyan and orange ovals represent TFBSs  
467 for *Awh* and *Pnr*, respectively. (B-C) Expression driven by *D. melanogaster E6* (B, *melE6*) and *D.*  
468 *sechellia E6* (C, *secE6*) in *D. melanogaster* stage 15 embryos. (D-G) Expression driven by *melE6*  
469 (D and F) and *secE6* (E and G) in pupal wings (D-E, 74 h APF) and dorsal abdomen (F-G, 84 h  
470 APF). (H-L) Expression driven by *melE6* (H), *D. simulans E6* (I, *simE6*), *D. simulans E6B* (B, J,  
471 *simE6B*) and *simE6B* mutants (K and L) in pupa (74 h APF). Red crosses in the schemes below  
472 images indicate mutated TFBSs (K, L).

473

474 **Fig 5. The regulatory information in enhancer *Z* is partially separated in two modules.**

475 (A-B) Expression driven by *D. melanogaster Z1.3* (A, *melZ1.3*) and *D. sechellia Z1.3* (B, *secZ1.3*) in  
476 *D. melanogaster* stage 15 embryos. (C-H) Expression of *melZ1.3* (C, E, G) and *secZ1.3* (D, F, H) in  
477 *D. melanogaster* pupal wings (C-D, 36 h AFP), legs (E-F, 36 h APF) and dorsal epidermis of the  
478 pupa (G-H, 74 h AFP). (I) Scheme of a subset of the *melZ1.3* enhancer fragments tested with  
479 transgenic reporter constructs. (J-P) Expression driven by *D.melanogaster Z1.3L* (*melZ1.3L*),  
480 *D.melanogaster Z1.3R* (*melZ1.3R*) and *D.melanogaster Z0.3* (*melZ0.3*) in stage 15 embryos (J, K,

481 P), pupal wings (L-M, 36 h AFP) and legs (N-O, 36 h AFP). (Q) Quantification of reporter activity  
482 in embryos (n=10) carrying *melZ1.3L*, *melZ1.3R* and *melZ0.3* reporter constructs. Mean  
483 intensity is shown with a black cross. (R) Genetic architecture of *melZ1.3*. *Z0.3* (dashed  
484 rectangle) carries most of the regulatory information used for embryonic expression, while  
485 *Z1.3R* (solid rectangle) contains the regulatory information used for pupal expression.  
486 Putative binding sites for a transcriptional repressor, which acts in the embryo, are indicated  
487 with red hexagons.

488

489 **Fig 6. Cis-regulation of *svb* varies between embryo and pupa.**

490 (A) Wild type and mutated versions of the *svb*BAC. The green and red triangles depict the  
491 coding sequence of GFP and DsRed, respectively. (B) Effect of enhancer deletions in  
492 embryonic expression;  $\Delta Z1.3$  (top),  $\Delta E6$  (middle) and  $\Delta 7H$  (bottom). Open circles indicate the  
493 average ratio (GFP/DsRed) for each individual. Closed black circles and vertical lines indicate  
494 mean and one standard deviation, respectively. P values were calculated with two-tailed  
495 unpaired t-tests (\* $p < 0.05$ , \*\* $p < 0.005$ , \*\*\*\* $p < 0.0001$ ). Boxes within embryo cartoons specify  
496 analyzed regions. (C) Effect of enhancer deletions on pupal expression. The GFP/DsRed ratio  
497 was measured in part of abdominal segment A4 (rectangle) of pupae 90 hours APF. Open  
498 circles indicate the average ratio (GFP/DsRed) for each individual. Closed black circles and  
499 vertical lines indicate mean and one standard deviation, respectively. P values were calculated  
500 with two-tailed unpaired t-tests (\* $p < 0.05$ , \*\* $p < 0.005$ , \*\*\*\* $p < 0.0001$ ).

501

502 **Fig 7. Enhancer deletions in the native *svb* locus alter the A5 trichome pattern only in**  
503 **males.**

504 (A) Diagram of the *svb* locus showing the genomic deletions on the X chromosome of lines  
505 *Df(X)svb<sup>108</sup>* and *Df(X)svb<sup>106</sup>*. Deletion in *Df(X)svb<sup>108</sup>* removes enhancers *DG2*, *DG3* and *Z*, while  
506 *Df(X)svb<sup>106</sup>* deletion removes enhancers *DG2*, *DG3*, *Z* and *A*. (B) A4 and A5 trichome pattern in  
507 adult males of *D. melanogaster*, *Df(X)svb<sup>108</sup>*, *Df(X)svb<sup>106</sup>* and *D. sechellia*. Blue boxes within the  
508 cartoon demarcate the imaged area.

### 509 **Supporting information**

#### 510 **S1 Fig. *svb*BAC-GFP expression in pupa and adult trichome patterns**

511 (A) Adult trichome pattern in abdominal segments A3 to A6 in female (left) and male (right).  
512 (B) *svb*BAC-GFP expression in the dorsum of abdominal segments A2 to A5 of pupae 50 hours  
513 APF (left). GFP fluorescence quantification in segments A4 and A5 (right). Each point  
514 represents the average mean intensity of all segmented nuclei in A4 and A5 for one individual  
515 (n=7). Significance was calculated with a two-tailed paired t-test, \*\*\* p<0.0005.

516

#### 517 **S2 Fig. *svb* is required for the formation of adult cuticular structures.**

518 (A-B) *Svb*<sup>-</sup> clones on T1 leg (A) and head (B) are outlined in cyan. (C-D) Wild type (C) and *svb*-  
519 clone modified (D) antennal arista.

#### 520 **S3 F. Expression driven by the seven *svb* embryonic enhancers in larva and pupa.**



521 (A-B) X-Gal staining of dissected tissues for each enhancer. (A) Enhancer expression in foregut,  
522 central nervous system and epidermis of third-instar larva. (B) Enhancer expression in leg 1  
523 and pupal wing. N.E.: No expression.

524

525 **S4 Fig. *shavenbaby* (*svb*) expression in different developmental stages of *Drosophila***  
526 ***sechellia*.** (A) Schematic representation of *D. sechellia svbBAC-GFP* (*sec-svbBAC-GFP*). Gray  
527 boxes represent the seven embryonic enhancers. The site of insertion of the GFP-NLS is  
528 indicated in the scheme. (B) *sec-svb-BAC-GFP* expression in stage 15 embryo. Quaternary cells  
529 on abdominal segment A2 are outlined. (C) *sec-svbBAC-GFP* expression in dorsal (left) and  
530 ventral (right) epidermis of a 90 hour APF pupa.

531 **S5 Fig. Dissection of the embryonic and pupal functions of *svb* Z enhancer.**

532 (A) Scheme of fragments tested for epidermal enhancer activity with reporter constructs  
533 (upper panel). Yellow boxes show fragments with enhancer activity (representative stage 15  
534 embryos are shown in the bottom). Gray boxes indicate no expression. (B) Schematic of a  
535 subset of the *svb* Z1.3 fragments tested for enhancer activity with reporter constructs. Stage  
536 15 embryos carrying enhancer::*lacZ* reporters stained with an antibody against  $\beta$ -Gal (C)  
537 Expression patterns of reporter constructs in pupal dorsal abdomen (74 hours APF) as  
538 determined by X-Gal staining.

539

540 **S6 Fig. Effect of enhancer deletions on *svbBAC-GFP* expression.**

541 (A-B) Representative images of *svb*BAC-GFP and *svb*BAC-DsRed expression in abdominal  
542 segments of embryo (A) and pupa (B). Black boxes in embryos demarcate analyzed regions for  
543 each deletion. The white box in segment A4 of the pupa demarcates the analyzed region.

544

545 **S1 Table. List of primers used in this study.**

546

547 **S2 Table. List of transgenic lines used in this study.**

548

## 549 **References**

550

- 551 1. Kim AR, Martinez C, Ionides J, Ramos AF, Ludwig MZ, et al. (2013) Rearrangements of 2.5 kilobases of  
552 noncoding DNA from the *Drosophila* even-skipped locus define predictive rules of genomic cis-  
553 regulatory logic. *PLoS Genet* 9: e1003243.
- 554 2. Zeitlinger J, Zinzen RP, Stark A, Kellis M, Zhang H, et al. (2007) Whole-genome ChIP-chip analysis of  
555 Dorsal, Twist, and Snail suggests integration of diverse patterning processes in the *Drosophila*  
556 embryo. *Genes Dev* 21: 385-390.
- 557 3. Williamson I, Lettice LA, Hill RE, Bickmore WA (2016) Shh and ZRS enhancer colocalisation is specific to  
558 the zone of polarising activity. *Development* 143: 2994-3001.
- 559 4. Montavon T, Soshnikova N, Mascrez B, Joye E, Thevenet L, et al. (2011) A regulatory archipelago  
560 controls Hox genes transcription in digits. *Cell* 147: 1132-1145.
- 561 5. Davidson EH (2010) *The Regulatory Genome: Gene Regulatory Networks In Development And*  
562 *Evolution*: Elsevier Science.

- 563 6. Stern DL (2000) Evolutionary developmental biology and the problem of variation. *Evolution* 54: 1079-  
564 1091.
- 565 7. Carroll SB (2008) Evo-devo and an expanding evolutionary synthesis: a genetic theory of  
566 morphological evolution. *Cell* 134: 25-36.
- 567 8. Wittkopp PJ, Kalay G (2011) Cis-regulatory elements: molecular mechanisms and evolutionary  
568 processes underlying divergence. *Nat Rev Genet* 13: 59-69.
- 569 9. Akam M (1998) Hox genes: from master genes to micromanagers. *Curr Biol* 8: R676-678.
- 570 10. Lonfat N, Montavon T, Darbellay F, Gitto S, Duboule D (2014) Convergent evolution of complex  
571 regulatory landscapes and pleiotropy at Hox loci. *Science* 346: 1004-1006.
- 572 11. Stern DL, Frankel N (2013) The structure and evolution of cis-regulatory regions: the shavenbaby  
573 story. *Philos Trans R Soc Lond B Biol Sci* 368: 20130028.
- 574 12. Arif S, Kittelmann S, McGregor AP (2015) From shavenbaby to the naked valley: trichome formation  
575 as a model for evolutionary developmental biology. *Evol Dev* 17: 120-126.
- 576 13. Payre F, Vincent A, Carreno S (1999) ovo/svb integrates Wingless and DER pathways to control  
577 epidermis differentiation. *Nature* 400: 271-275.
- 578 14. Delon I, Chanut-Delalande H, Payre F (2003) The Ovo/Shavenbaby transcription factor specifies actin  
579 remodelling during epidermal differentiation in *Drosophila*. *Mech Dev* 120: 747-758.
- 580 15. Chanut-Delalande H, Hashimoto Y, Pelissier-Monier A, Spokony R, Dib A, et al. (2014) Pri peptides are  
581 mediators of ecdysone for the temporal control of development. *Nat Cell Biol* 16: 1035-1044.
- 582 16. Pueyo JI, Couso JP (2011) Tarsal-less peptides control Notch signalling through the Shavenbaby  
583 transcription factor. *Dev Biol* 355: 183-193.
- 584 17. Preger-Ben Noon E, Davis FP, Stern DL (2016) Evolved Repression Overcomes Enhancer Robustness.  
585 *Dev Cell* 39: 572-584.

- 586 18. Crocker J, Abe N, Rinaldi L, McGregor AP, Frankel N, et al. (2015) Low affinity binding site clusters  
587 confer hox specificity and regulatory robustness. *Cell* 160: 191-203.
- 588 19. Frankel N, Erezylmaz DF, McGregor AP, Wang S, Payre F, et al. (2011) Morphological evolution  
589 caused by many subtle-effect substitutions in regulatory DNA. *Nature* 474: 598-603.
- 590 20. Frankel N, Davis GK, Vargas D, Wang S, Payre F, et al. (2010) Phenotypic robustness conferred by  
591 apparently redundant transcriptional enhancers. *Nature* 466: 490-493.
- 592 21. McGregor AP, Orgogozo V, Delon I, Zanet J, Srinivasan DG, et al. (2007) Morphological evolution  
593 through multiple cis-regulatory mutations at a single gene. *Nature* 448: 587-590.
- 594 22. Frankel N (2012) Multiple layers of complexity in cis-regulatory regions of developmental genes. *Dev*  
595 *Dyn* 241: 1857-1866.
- 596 23. Infante CR, Mihala AG, Park S, Wang JS, Johnson KK, et al. (2015) Shared Enhancer Activity in the  
597 Limbs and Phallus and Functional Divergence of a Limb-Genital cis-Regulatory Element in  
598 Snakes. *Dev Cell* 35: 107-119.
- 599 24. Schep R, Necsulea A, Rodriguez-Carballo E, Guerreiro I, Andrey G, et al. (2016) Control of Hoxd gene  
600 transcription in the mammary bud by hijacking a preexisting regulatory landscape. *Proc Natl*  
601 *Acad Sci U S A* 113: E7720-E7729.
- 602 25. Frankel N, Wang S, Stern DL (2012) Conserved regulatory architecture underlies parallel genetic  
603 changes and convergent phenotypic evolution. *Proc Natl Acad Sci U S A* 109: 20975-20979.
- 604 26. Cande J, Goltsev Y, Levine MS (2009) Conservation of enhancer location in divergent insects. *Proc*  
605 *Natl Acad Sci U S A* 106: 14414-14419.
- 606 27. Glassford WJ, Johnson WC, Dall NR, Smith SJ, Liu Y, et al. (2015) Co-option of an Ancestral Hox-  
607 Regulated Network Underlies a Recently Evolved Morphological Novelty. *Dev Cell* 34: 520-531.
- 608 28. Smith E, Shilatifard A (2014) Enhancer biology and enhanceropathies. *Nat Struct Mol Biol* 21: 210-  
609 219.

- 610 29. Krijger PH, de Laat W (2016) Regulation of disease-associated gene expression in the 3D genome.  
611 Nat Rev Mol Cell Biol 17: 771-782.
- 612 30. Gilbert SF (2010) Developmental Biology: Sinauer Associates.
- 613 31. Wang S, Zhao Y, Leiby M, Zhu J (2009) A new positive/negative selection scheme for precise BAC  
614 recombineering. Mol Biotechnol 42: 110-116.
- 615 32. Halachmi N, Nachman A, Salzberg A (2012) Visualization of proprioceptors in Drosophila larvae and  
616 pupae. J Vis Exp: e3846.

617

618

619

**Figure 1**

**A**

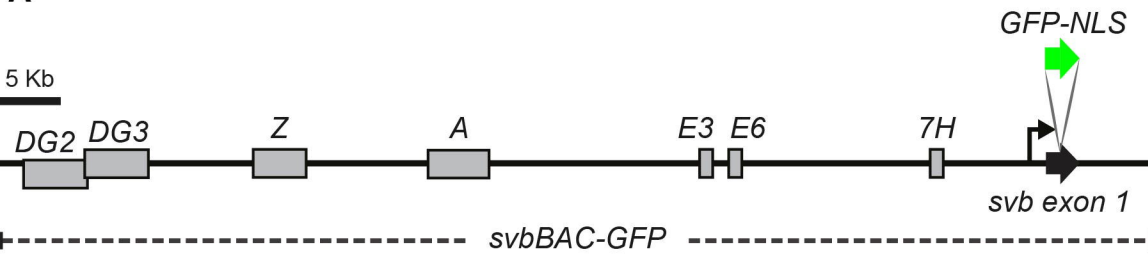

**B**

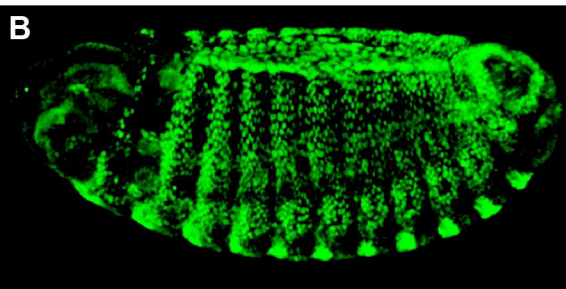

**C**

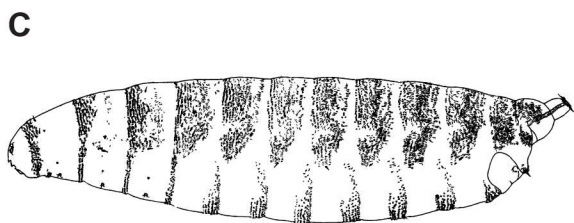

**D**

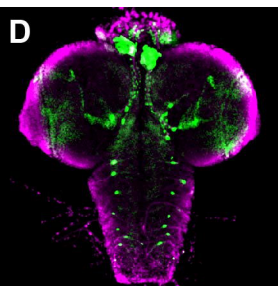

**E**

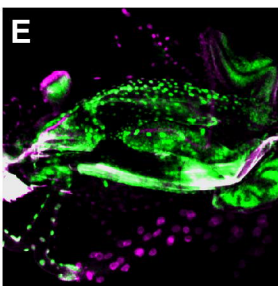

**F**

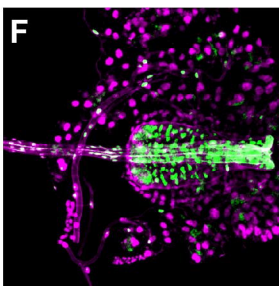

**G**

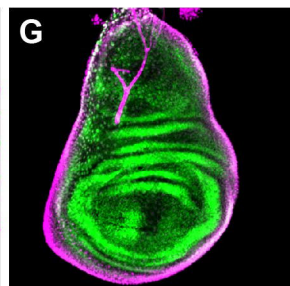

**H**

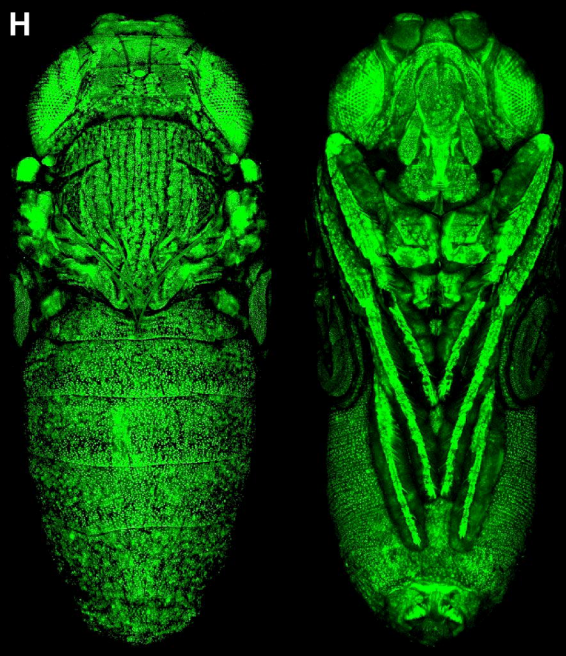

**I**

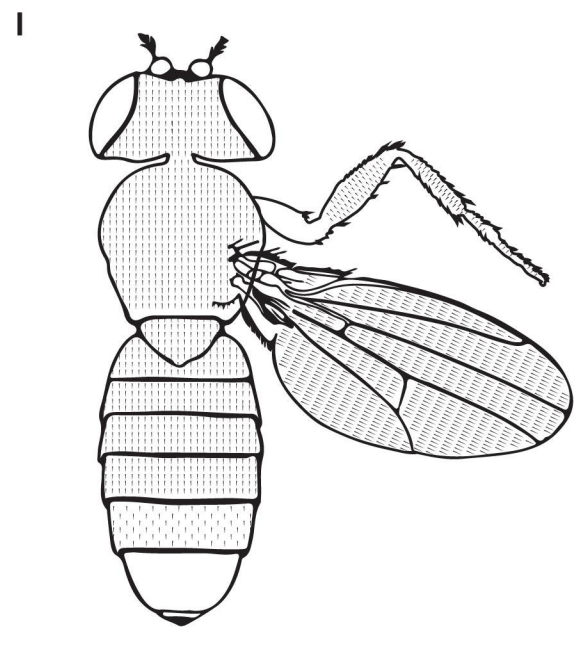

Figure 2

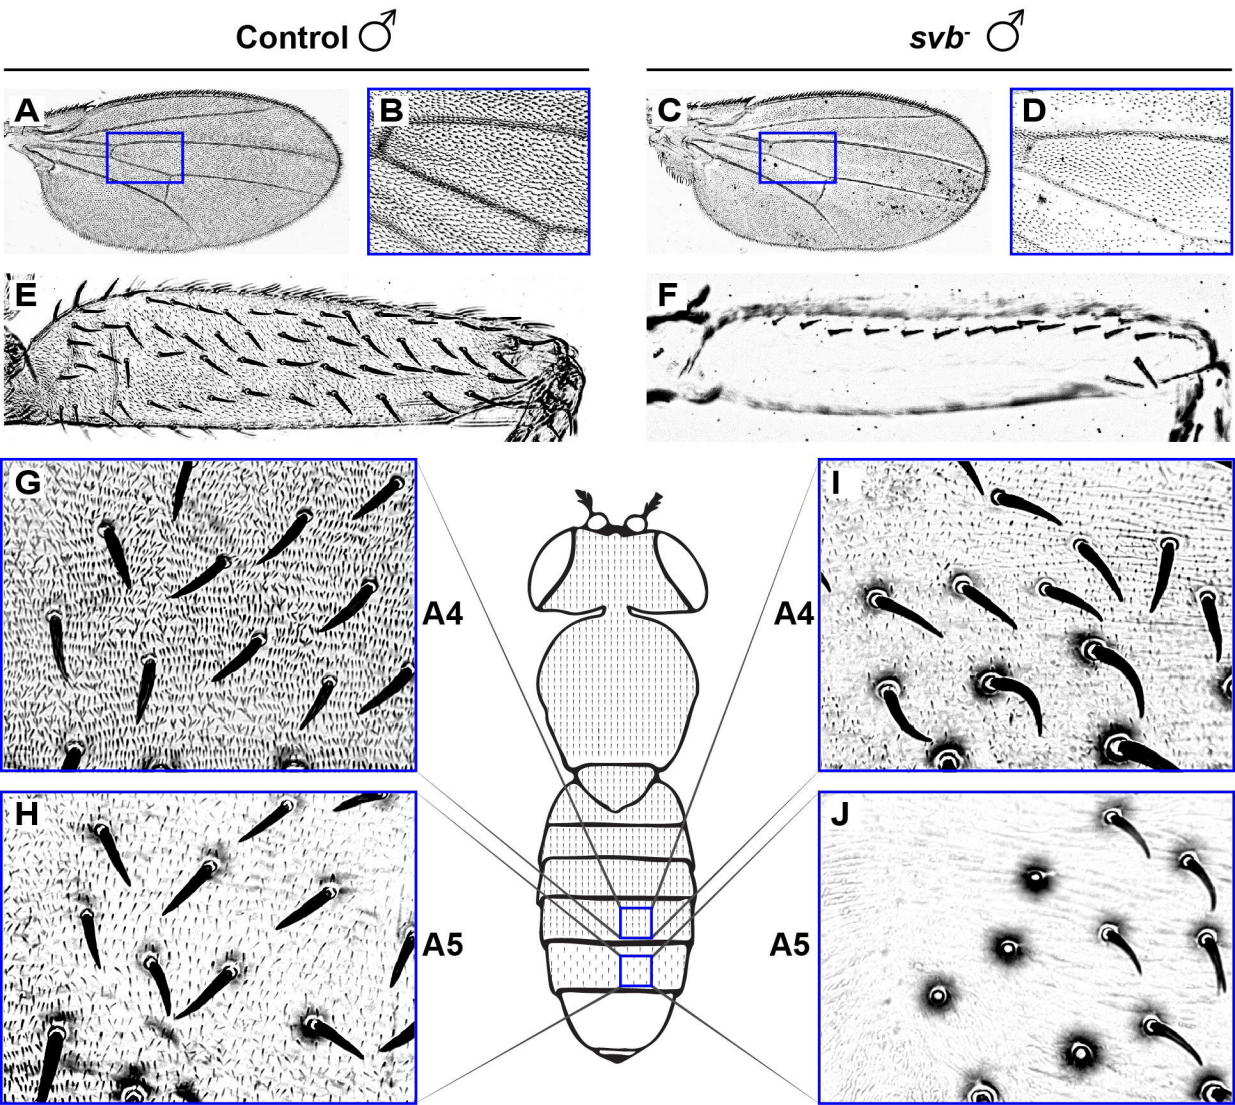

**Figure 3****A**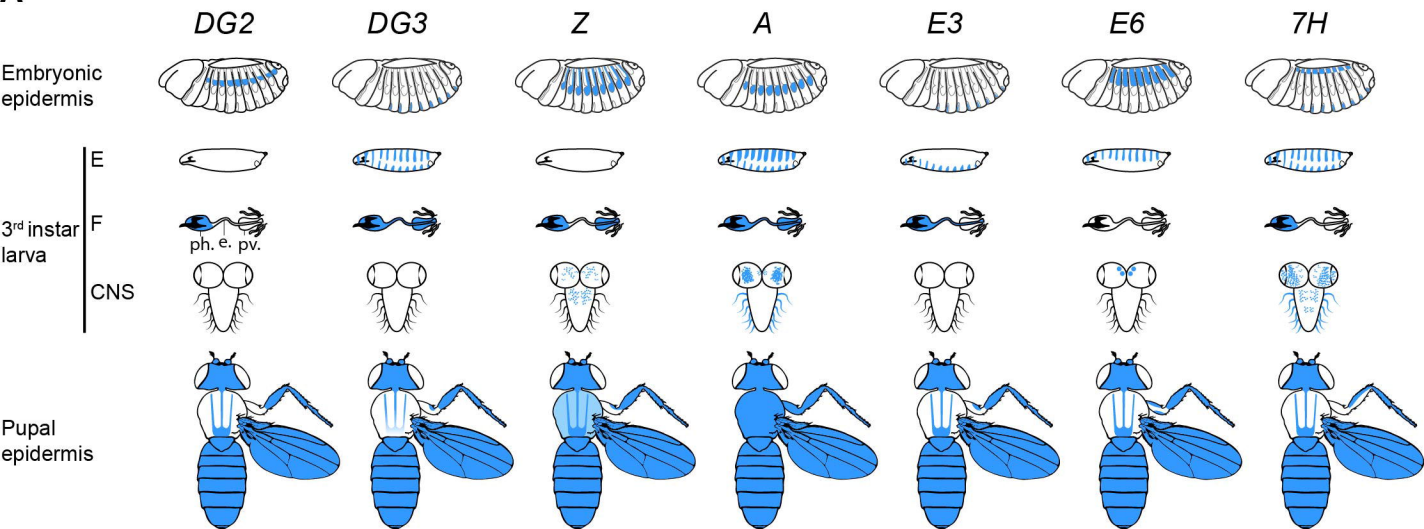**B**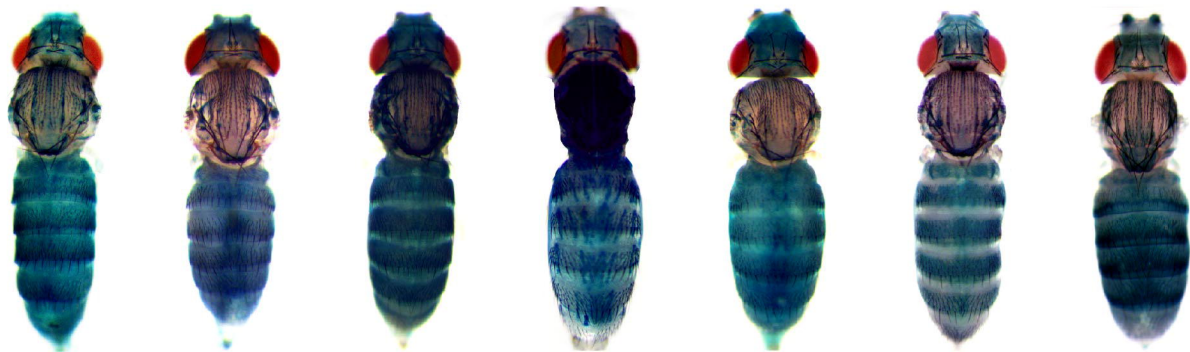



**Figure 4**

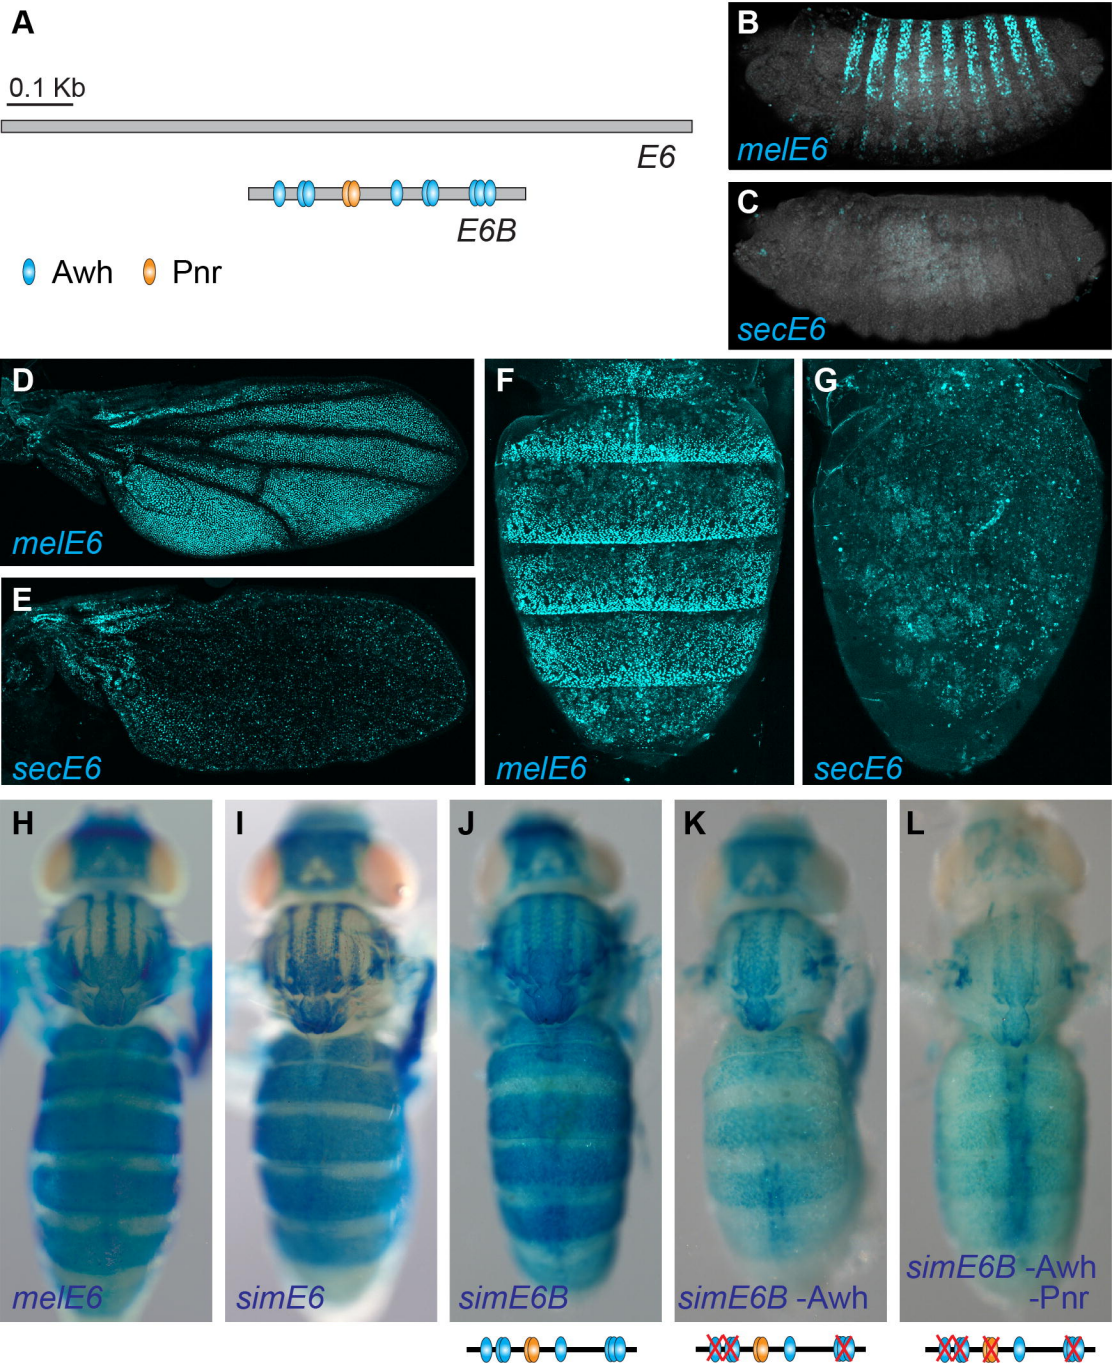

**Figure 5**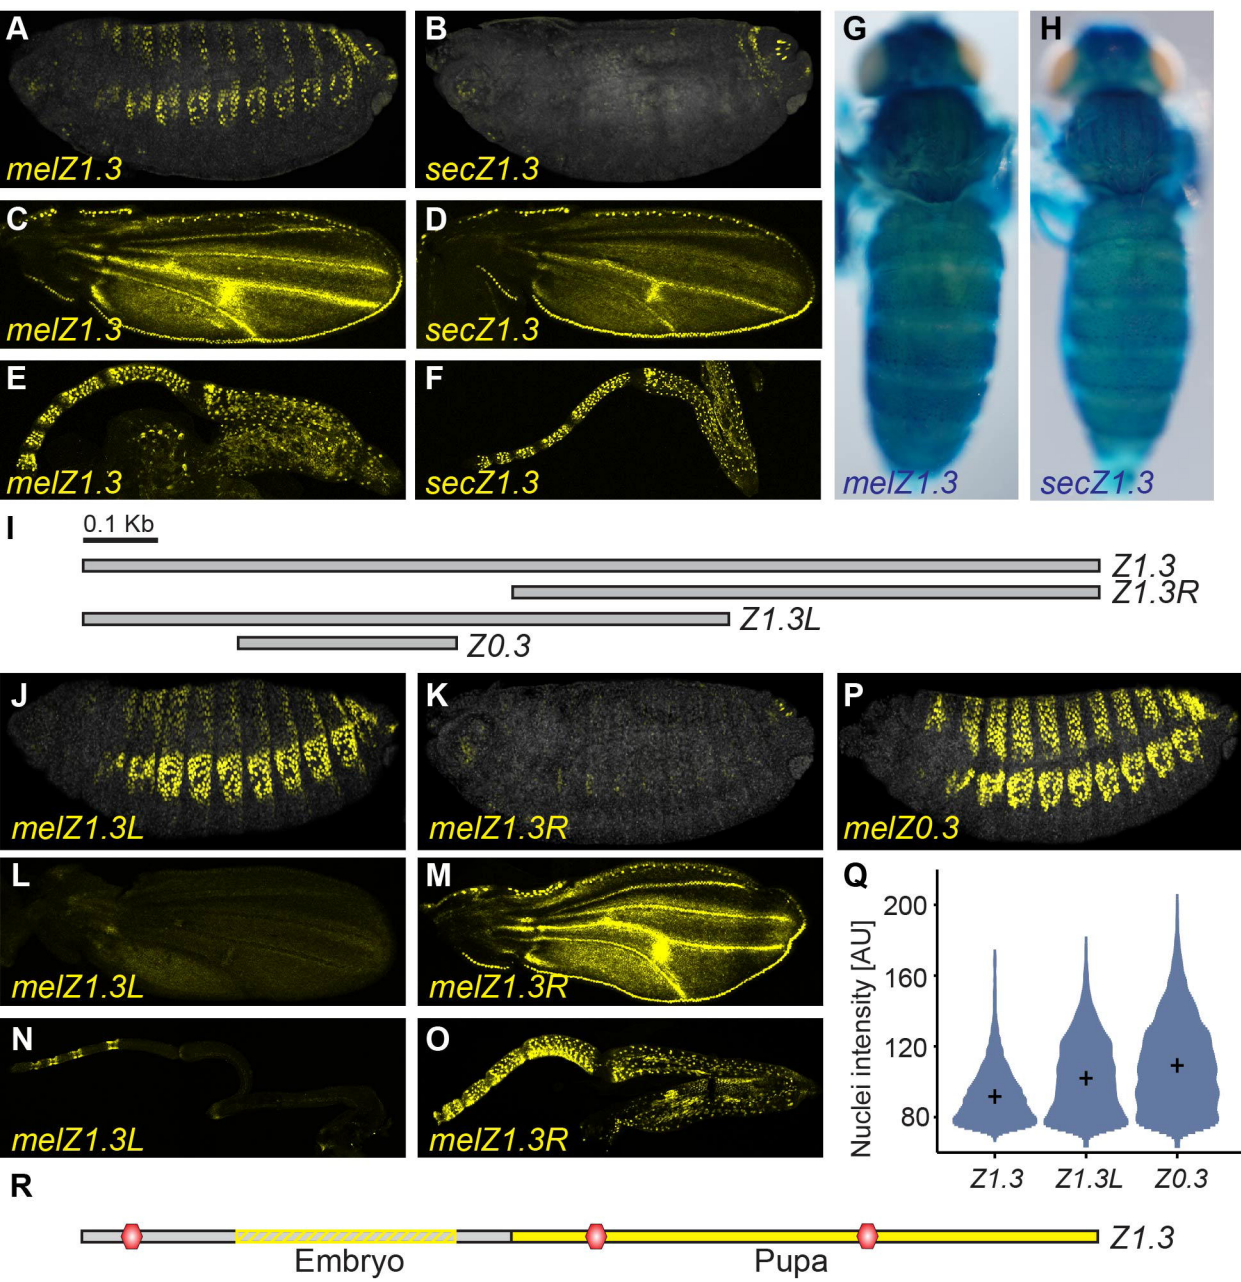

**Figure 6****A**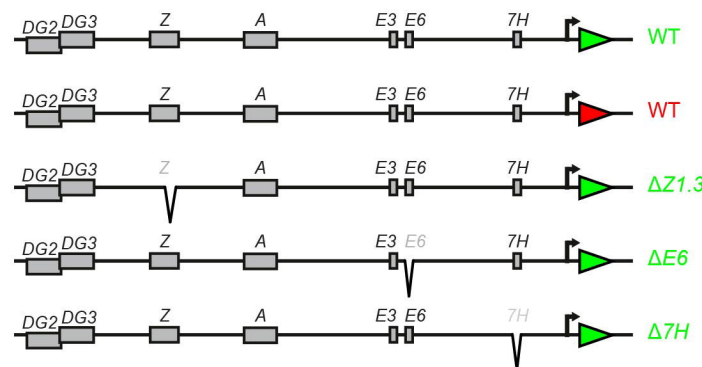**B**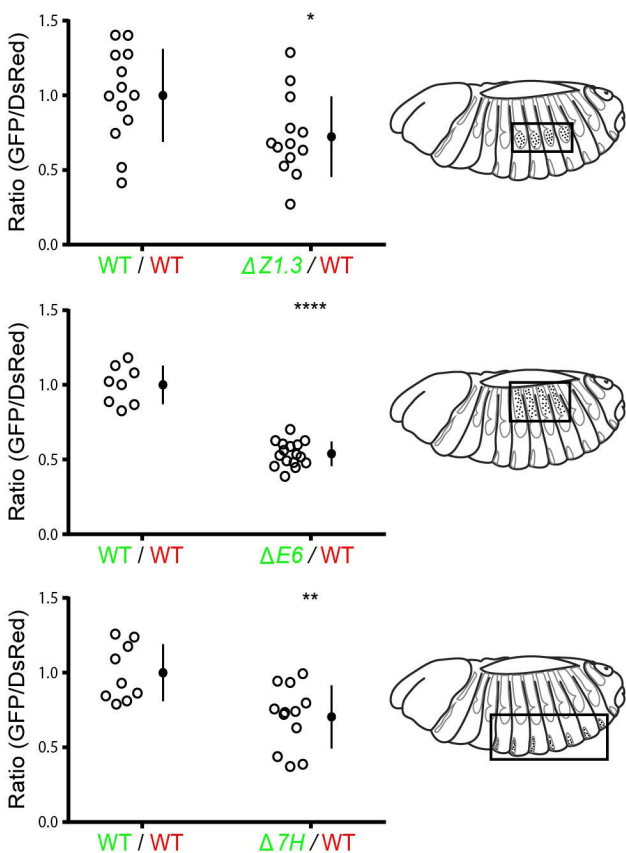**C**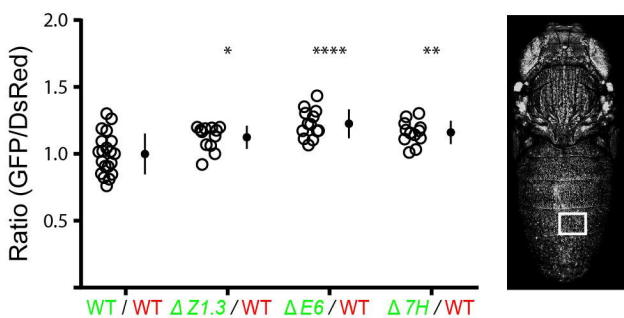

**Figure 7**

**A**

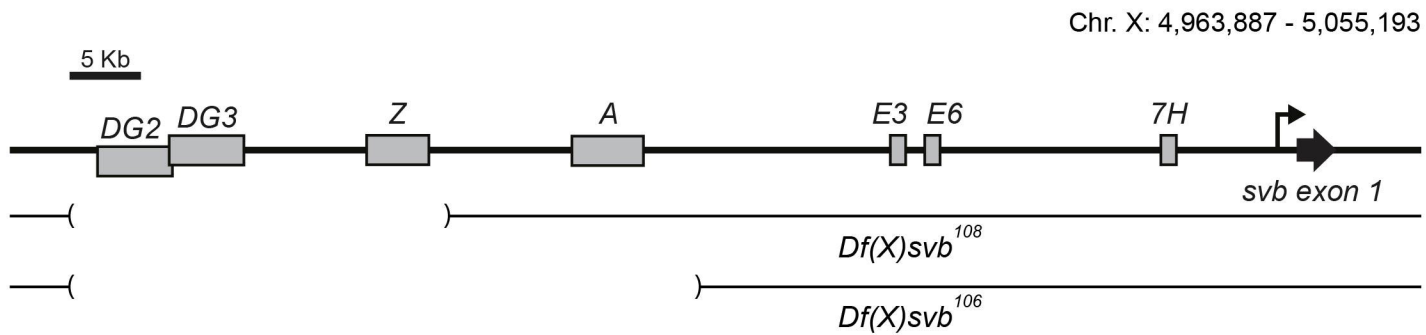

**B**

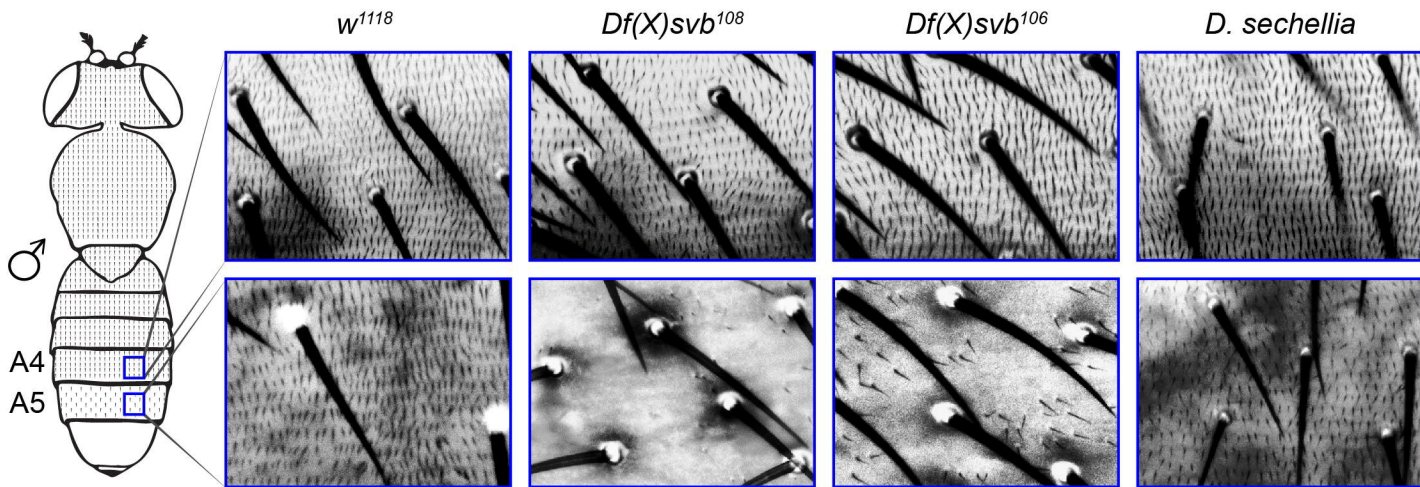

Source: http://www.biorxiv.org/content/10.1101/188532v1.full.pdf
